# Supplementary material for: Entropic selectivity in air separation via a bilayer nanoporous graphene membrane
Source: Royal Society of Chemistry journal article supplement (doi:10.1039/c9cp02670c), 2019-01-01
Supplement: c9cp02670c3.pdf [file c9cp02670c3.pdf]

*Electronic Supplementary Information*

# **Entropic selectivity in air separation via a bilayer nanoporous graphene membrane**

Song Wang,<sup>a</sup> Sheng Dai,<sup>b,c</sup> and De-en Jiang<sup>\*a</sup>

<sup>a</sup>Department of Chemistry, University of California, Riverside, California 92521, United States

<sup>b</sup>Chemical Sciences Division, Oak Ridge National Laboratory, Oak Ridge, Tennessee 37831,  
United States

<sup>c</sup>Department of Chemistry, The University of Tennessee, Knoxville, Tennessee 37996, United  
States

\*Corresponding author. Email: [djiang@ucr.edu](mailto:djiang@ucr.edu)

## **Table of Contents**

- 1. Definition of the effective pore size ( $d$ )**
- 2. Comparison of flexible and frozen membranes for gas permeation.**
- 3. Calculation of vibrational amplitudes of O<sub>2</sub> and N<sub>2</sub> at 300 K**
- 4. Calculation of entropic selectivity**
- 5. Force field parameters**

## 1. Definition of the effective pore size ( $d$ )

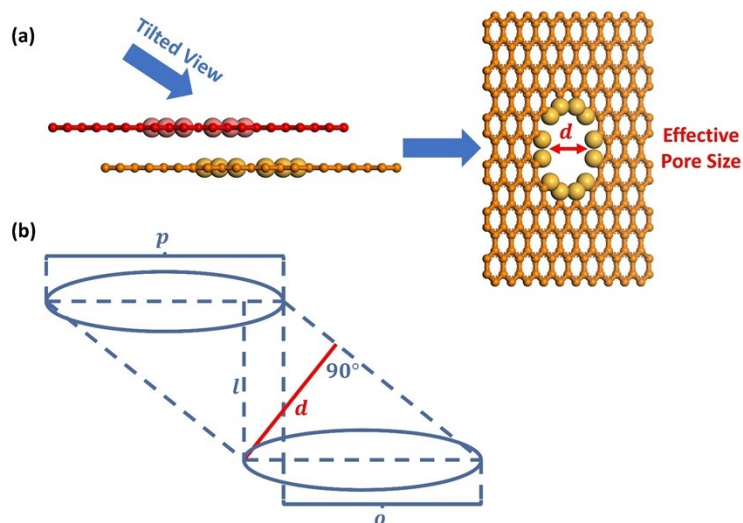

**Fig. S1.** (a) Side view and tilted view of bilayer nanoporous graphene membrane; (b) Schematic of cross section of pore (5.7 Å).

$$d = \frac{l}{\sqrt{l^2 + o^2}} \times p$$

$l$ : the interlayer distance;

$o$ : is the offset

$p$ : single-layer pore size.

**Table S1.** Five numbers of offset used in this work and corresponding effective pore sizes.

| $p = 5.7 \text{ \AA}, l = 3.4 \text{ \AA}$ |      |      |      |      |      |
|--------------------------------------------|------|------|------|------|------|
| $o/\text{\AA}$                             | 4.16 | 4.26 | 4.36 | 4.46 | 4.56 |
| $d/\text{\AA}$                             | 3.60 | 3.55 | 3.50 | 3.45 | 3.40 |

## 2. Comparison of flexible and frozen membranes for gas permeation.

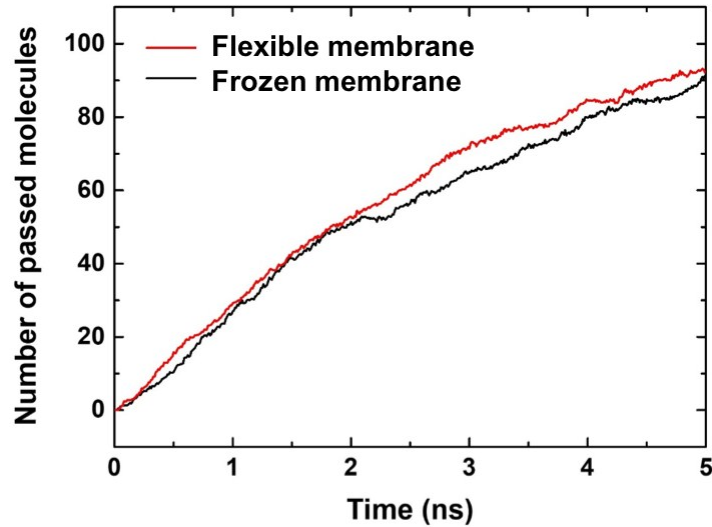

Fig. S2. Numbers of O<sub>2</sub> molecules passed through frozen (black) and flexible (red) bilayer nanoporous graphene membranes with the effective pore size of 3.60 Å. For the flexible membrane, all atoms of the membrane were allowed to move on the *xy* plane while the *z* coordinates as well as the center of mass of the bilayer membrane were constrained at their initial positions.

## 3. Calculation of vibrational amplitudes of O<sub>2</sub> and N<sub>2</sub> at 300 K

Following a previous study (E. J. Baran, *Zeitschrift für Naturforschung A*, 2003, **58**, 36-38), we have calculated the mean amplitudes of vibration of O<sub>2</sub> and N<sub>2</sub> by the following equations:

$$u_{XY}^2 = G_{XY} \cdot \nabla_1 \quad (1)$$

$$G_{XY} = \mu_X + \mu_Y \quad (2)$$

$$\nabla_1 = \left[ \frac{h}{8\pi^2 \nu_1} \right] \coth(h\nu_1/2kT) \quad (3)$$

where  $\mu_X$  and  $\mu_Y$  are the reduced masses of the atoms X and Y, in the current case being X=Y (O or N atom), and  $\nu_1$  is the characteristic vibrational frequency ( $\nu_1$ ) of the bond (1568 cm<sup>-1</sup> for O<sub>2</sub> and 2446 cm<sup>-1</sup> for N<sub>2</sub>). Thus, at 300 K, the calculated mean amplitudes of vibration ( $\nabla_1$ ) are 0.0367 Å for O<sub>2</sub> and 0.0314 Å for N<sub>2</sub>.

#### 4. Calculation of entropic selectivity

According to transition state theory of diffusion,<sup>1,2</sup> the O<sub>2</sub>/N<sub>2</sub> entropic diffusion selectivity can be written as:

$$\left(\frac{D_{O_2}}{D_{N_2}}\right)_{entropic} = \exp\left(\frac{S_{D,O_2} - S_{D,N_2}}{R}\right) = \frac{(F^\ddagger/F)_{O_2}}{(F^\ddagger/F)_{N_2}}$$

where  $D$  is diffusion,  $S$  is entropy,  $F$  is partition function for normal state, and  $F^\ddagger$  is partition function for transition state. The partition function includes translational, rotational, and vibrational contributions, as shown below:

$$F = F_{trans} \cdot F_{rot} \cdot F_{vib}, \quad F_{trans} = \left(\frac{2\pi mkT}{h^2}\right)^{n/2} a^n, \quad F_{rot} = \left(\frac{T}{\sigma\theta_r}\right)^{n/2}, \quad F_{vib} = \left[\frac{\exp\left(-\frac{\theta_v}{2T}\right)}{1 - \exp\left(-\frac{\theta_v}{T}\right)}\right]^n$$

where  $n$  is degree of freedom,  $m$  is mass of molecule,  $k$  is Boltzmann constant,  $h$  is Planck constant,  $a$  is cavity length (which is the difference between gas molecular width and the elliptical pore size<sup>2</sup>),  $\sigma$  is symmetry number of gas molecule,  $\theta_r$  is characteristic rotational temperature,  $\theta_v$  is characteristic vibrational temperature. In the transition state, all two rotational degrees of freedom of N<sub>2</sub> is suppressed, while O<sub>2</sub> still keeps one unconstrained rotational degrees of freedom. And in the transition state, both of N<sub>2</sub> and O<sub>2</sub> are believed to only have two translational degrees

of freedom, since the factor  $\frac{kT}{h}$  accounts for the translational degree of freedom in the direction of gas diffusion. The vibrational degrees of freedom of N<sub>2</sub> and O<sub>2</sub> are unrestricted in both normal and

transitional state.<sup>1</sup> Thus, the vibrational partition functions are cancelled out. Table S2 shows the parameters used in calculations. According to these functions and parameters, the O<sub>2</sub>/N<sub>2</sub> entropy difference is 5.67 cal/K and entropic diffusion selectivity is 17.3 at 300 K.

**Table S2.** Parameters used in entropic selectivity calculation when effective pore size of 3.45 Å<sup>1,2</sup>

|                              | O <sub>2</sub>                            | N <sub>2</sub>                            |
|------------------------------|-------------------------------------------|-------------------------------------------|
| $a$ for normal state / Å     | 100                                       | 100                                       |
| $a$ for transition state / Å | 0.77 for short axis<br>2.85 for long axis | 0.36 for short axis<br>2.01 for long axis |
| $\sigma$                     | 2                                         | 2                                         |
| $\theta_r$                   | 2.07                                      | 2.88                                      |

## 5. Force field parameters

### 5.1. Gas molecules

**Table S3.** Force field parameters for gas molecules<sup>3</sup>

| O <sub>2</sub> |                       |              |         |
|----------------|-----------------------|--------------|---------|
|                | $\epsilon$ (kcal/mol) | $\sigma$ (Å) | $q$ (e) |
| O              | 0.108                 | 3.050        | -0.1120 |
| COM            | 0                     | 0            | 0.2240  |
| bonds          | length (Å)            |              |         |
| O-O            | 1.21                  |              |         |
| N <sub>2</sub> |                       |              |         |
|                | $\epsilon$ (K)        | $\sigma$ (Å) | $q$ (e) |
| N              | 0.0728                | 3.318        | -0.4048 |
| COM            | 0                     | 0            | 0.8096  |
| bonds          | length (Å)            |              |         |
| N-N            | 1.098                 |              |         |

### 5.2. Porous graphene

**Table S4.** Lennard-Jones parameters for the bilayer porous graphene membrane<sup>4</sup>

|   | $\epsilon$ (kcal/mol) | $\sigma$ (Å) |
|---|-----------------------|--------------|
| C | 0.086                 | 3.400        |
| H | 0.015                 | 2.450        |

**Cartesian coordinates (Å) and partial atomic charges on the single-layer porous graphene**

Rectangular unit cell: a=24.6076 Å, b=25.7308 Å

|   | q / e  | x         | y         |
|---|--------|-----------|-----------|
| C | -0.008 | 5.660565  | 7.186368  |
| C | 0.017  | 6.891031  | 7.901653  |
| C | -0.021 | 8.121366  | 7.186365  |
| C | 0.084  | 9.351711  | 7.901561  |
| C | 0.091  | 10.582106 | 7.186303  |
| C | -0.333 | 11.812498 | 7.901617  |
| C | 0.201  | 13.042896 | 7.186299  |
| C | -0.333 | 14.273285 | 7.901627  |
| C | 0.090  | 15.503616 | 7.186307  |
| C | 0.085  | 16.733982 | 7.901628  |
| C | -0.021 | 17.964414 | 7.186293  |
| C | 0.017  | 19.194780 | 7.901614  |
| C | -0.008 | 20.425110 | 7.186295  |
| C | 0.005  | 21.655501 | 7.901623  |
| C | 0.000  | 22.885898 | 7.186305  |
| C | 0.000  | 24.116291 | 7.901618  |
| C | 0.000  | 0.739085  | 7.186360  |
| C | 0.000  | 1.969431  | 7.901556  |
| C | 0.001  | 3.199765  | 7.186269  |
| C | 0.004  | 4.430231  | 7.901553  |
| C | -0.022 | 5.660566  | 11.474811 |
| C | 0.015  | 5.660565  | 10.045806 |
| C | 0.088  | 6.891030  | 12.190132 |
| C | -0.332 | 8.121367  | 11.474808 |
| C | -0.024 | 6.891032  | 9.330482  |
| C | 0.199  | 8.121364  | 10.045809 |
| C | -0.331 | 9.351714  | 9.330574  |
| C | -0.332 | 17.964414 | 11.474736 |

|   |        |           |           |
|---|--------|-----------|-----------|
| C | -0.331 | 16.733989 | 9.330507  |
| C | 0.200  | 17.964408 | 10.045881 |
| C | 0.088  | 19.194781 | 12.190093 |
| C | -0.022 | 20.425110 | 11.474739 |
| C | -0.025 | 19.194787 | 9.330521  |
| C | 0.015  | 20.425103 | 10.045879 |
| C | -0.006 | 21.655501 | 12.190100 |
| C | 0.007  | 22.885897 | 11.474749 |
| C | -0.008 | 21.655508 | 9.330513  |
| C | 0.002  | 22.885891 | 10.045868 |
| C | -0.002 | 24.116291 | 12.190096 |
| C | -0.001 | 0.739085  | 11.474804 |
| C | -0.001 | 24.116295 | 9.330517  |
| C | 0.000  | 0.739083  | 10.045813 |
| C | -0.002 | 1.969431  | 12.190036 |
| C | 0.007  | 3.199765  | 11.474711 |
| C | -0.001 | 1.969431  | 9.330579  |
| C | 0.002  | 3.199765  | 10.045905 |
| C | -0.007 | 4.430231  | 12.190033 |
| C | -0.008 | 4.430231  | 9.330582  |
| C | 0.015  | 5.660565  | 15.763292 |
| C | -0.022 | 5.660565  | 14.334252 |
| C | -0.024 | 6.891031  | 16.478598 |
| C | 0.200  | 8.121366  | 15.763289 |
| C | 0.088  | 6.891032  | 13.618961 |
| C | -0.332 | 8.121364  | 14.334255 |
| C | -0.331 | 9.351711  | 16.478504 |
| C | -0.331 | 16.733982 | 16.478571 |
| C | 0.200  | 17.964414 | 15.763219 |
| C | -0.332 | 17.964408 | 14.334325 |
| C | -0.024 | 19.194781 | 16.478556 |
| C | 0.015  | 20.425110 | 15.763223 |
| C | 0.088  | 19.194787 | 13.619002 |
| C | -0.022 | 20.425103 | 14.334322 |
| C | -0.008 | 21.655501 | 16.478562 |
| C | 0.002  | 22.885897 | 15.763233 |
| C | -0.006 | 21.655508 | 13.618995 |
| C | 0.007  | 22.885891 | 14.334312 |
| C | -0.001 | 24.116291 | 16.478560 |
| C | 0.001  | 0.739084  | 15.763286 |
| C | -0.002 | 24.116295 | 13.618998 |
| C | -0.001 | 0.739083  | 14.334259 |
| C | -0.001 | 1.969431  | 16.478501 |

|   |        |           |           |
|---|--------|-----------|-----------|
| C | 0.002  | 3.199765  | 15.763192 |
| C | -0.002 | 1.969431  | 13.619058 |
| C | 0.007  | 3.199765  | 14.334352 |
| C | -0.008 | 4.430231  | 16.478498 |
| C | -0.006 | 4.430231  | 13.619061 |
| C | 0.001  | 5.660566  | 20.051730 |
| C | -0.008 | 5.660565  | 18.622753 |
| C | 0.010  | 6.891031  | 20.767080 |
| C | -0.008 | 8.121366  | 20.051727 |
| C | 0.017  | 6.891031  | 17.907403 |
| C | -0.021 | 8.121365  | 18.622755 |
| C | -0.005 | 9.351711  | 20.766986 |
| C | -0.025 | 10.582106 | 20.051668 |
| C | 0.084  | 9.351714  | 17.907496 |
| C | 0.091  | 10.582101 | 18.622814 |
| C | 0.018  | 11.812498 | 20.767038 |
| C | -0.028 | 13.042896 | 20.051666 |
| C | -0.333 | 11.812506 | 17.907444 |
| C | 0.201  | 13.042888 | 18.622816 |
| C | 0.018  | 14.273286 | 20.767048 |
| C | -0.025 | 15.503616 | 20.051673 |
| C | -0.333 | 14.273294 | 17.907434 |
| C | 0.090  | 15.503609 | 18.622810 |
| C | -0.005 | 16.733982 | 20.767053 |
| C | -0.008 | 17.964414 | 20.051657 |
| C | 0.085  | 16.733989 | 17.907430 |
| C | -0.021 | 17.964408 | 18.622825 |
| C | 0.010  | 19.194780 | 20.767037 |
| C | 0.001  | 20.425111 | 20.051662 |
| C | 0.017  | 19.194787 | 17.907445 |
| C | -0.008 | 20.425103 | 18.622821 |
| C | -0.001 | 21.655500 | 20.767044 |
| C | 0.000  | 22.885898 | 20.051672 |
| C | 0.005  | 21.655508 | 17.907439 |
| C | 0.000  | 22.885891 | 18.622811 |
| C | 0.000  | 24.116290 | 20.767042 |
| C | 0.000  | 0.739085  | 20.051724 |
| C | 0.000  | 24.116295 | 17.907440 |
| C | 0.000  | 0.739082  | 18.622758 |
| C | 0.000  | 1.969430  | 20.766983 |
| C | 0.001  | 3.199766  | 20.051630 |
| C | 0.000  | 1.969431  | 17.907499 |
| C | 0.000  | 3.199765  | 18.622852 |



|   |        |           |           |
|---|--------|-----------|-----------|
| C | -0.001 | 4.430230  | 20.766980 |
| C | 0.005  | 4.430231  | 17.907502 |
| C | 0.000  | 5.660565  | 24.340230 |
| C | 0.001  | 5.660565  | 22.911191 |
| C | 0.000  | 6.891032  | 25.055521 |
| C | 0.000  | 8.121365  | 24.340227 |
| C | -0.004 | 6.891031  | 22.195885 |
| C | -0.002 | 8.121365  | 22.911193 |
| C | 0.000  | 9.351712  | 25.055428 |
| C | -0.001 | 10.582105 | 24.340168 |
| C | 0.007  | 9.351714  | 22.195978 |
| C | 0.002  | 10.582101 | 22.911253 |
| C | 0.001  | 11.812499 | 25.055482 |
| C | 0.000  | 13.042895 | 24.340165 |
| C | -0.008 | 11.812505 | 22.195926 |
| C | 0.004  | 13.042888 | 22.911255 |
| C | 0.001  | 14.273286 | 25.055492 |
| C | -0.001 | 15.503616 | 24.340172 |
| C | -0.008 | 14.273293 | 22.195916 |
| C | 0.002  | 15.503609 | 22.911248 |
| C | 0.000  | 16.733982 | 25.055495 |
| C | 0.000  | 17.964414 | 24.340157 |
| C | 0.007  | 16.733989 | 22.195912 |
| C | -0.002 | 17.964407 | 22.911263 |
| C | 0.000  | 19.194780 | 25.055480 |
| C | 0.000  | 20.425111 | 24.340161 |
| C | -0.004 | 19.194788 | 22.195927 |
| C | 0.001  | 20.425102 | 22.911259 |
| C | 0.000  | 21.655500 | 25.055487 |
| C | 0.000  | 22.885899 | 24.340171 |
| C | -0.001 | 21.655509 | 22.195920 |
| C | 0.001  | 22.885890 | 22.911249 |
| C | 0.000  | 24.116290 | 25.055485 |
| C | 0.000  | 0.739086  | 24.340224 |
| C | 0.000  | 24.116296 | 22.195922 |
| C | 0.000  | 0.739081  | 22.911197 |
| C | 0.000  | 1.969430  | 25.055425 |
| C | 0.000  | 3.199766  | 24.340131 |
| C | 0.000  | 1.969433  | 22.195981 |
| C | 0.001  | 3.199764  | 22.911290 |
| C | 0.000  | 4.430231  | 25.055422 |
| C | -0.001 | 4.430231  | 22.195984 |
| C | 0.001  | 5.660565  | 2.897877  |

|   |        |           |          |
|---|--------|-----------|----------|
| C | 0.000  | 5.660566  | 1.468871 |
| C | -0.004 | 6.891031  | 3.613200 |
| C | -0.002 | 8.121365  | 2.897874 |
| C | 0.000  | 6.891031  | 0.753550 |
| C | 0.000  | 8.121365  | 1.468874 |
| C | 0.007  | 9.351711  | 3.613108 |
| C | 0.002  | 10.582105 | 2.897812 |
| C | 0.000  | 9.351713  | 0.753643 |
| C | -0.001 | 10.582101 | 1.468935 |
| C | -0.008 | 11.812499 | 3.613164 |
| C | 0.004  | 13.042895 | 2.897808 |
| C | 0.001  | 11.812505 | 0.753588 |
| C | 0.000  | 13.042888 | 1.468939 |
| C | -0.008 | 14.273286 | 3.613174 |
| C | 0.002  | 15.503615 | 2.897816 |
| C | 0.001  | 14.273293 | 0.753578 |
| C | -0.001 | 15.503609 | 1.468932 |
| C | 0.007  | 16.733983 | 3.613176 |
| C | -0.002 | 17.964414 | 2.897802 |
| C | 0.000  | 16.733988 | 0.753575 |
| C | 0.000  | 17.964408 | 1.468946 |
| C | -0.004 | 19.194780 | 3.613161 |
| C | 0.001  | 20.425111 | 2.897804 |
| C | 0.000  | 19.194788 | 0.753590 |
| C | 0.000  | 20.425102 | 1.468943 |
| C | -0.001 | 21.655500 | 3.613170 |
| C | 0.001  | 22.885899 | 2.897814 |
| C | 0.000  | 21.655509 | 0.753583 |
| C | 0.000  | 22.885890 | 1.468933 |
| C | 0.000  | 24.116290 | 3.613165 |
| C | 0.000  | 0.739086  | 2.897869 |
| C | 0.000  | 24.116296 | 0.753586 |
| C | 0.000  | 0.739082  | 1.468878 |
| C | 0.000  | 1.969430  | 3.613104 |
| C | 0.001  | 3.199766  | 2.897777 |
| C | 0.000  | 1.969432  | 0.753647 |
| C | 0.000  | 3.199765  | 1.468971 |
| C | -0.001 | 4.430231  | 3.613100 |
| C | 0.000  | 4.430231  | 0.753649 |
| C | 0.000  | 5.660565  | 5.757314 |
| C | 0.010  | 6.891031  | 5.042030 |
| C | -0.008 | 8.121365  | 5.757318 |
| C | -0.005 | 9.351714  | 5.042122 |

|   |        |           |           |
|---|--------|-----------|-----------|
| C | -0.025 | 10.582101 | 5.757380  |
| C | 0.018  | 11.812505 | 5.042066  |
| C | -0.028 | 13.042888 | 5.757384  |
| C | 0.018  | 14.273293 | 5.042056  |
| C | -0.025 | 15.503609 | 5.757375  |
| C | -0.005 | 16.733988 | 5.042054  |
| C | -0.008 | 17.964408 | 5.757389  |
| C | 0.010  | 19.194788 | 5.042068  |
| C | 0.000  | 20.425102 | 5.757388  |
| C | -0.001 | 21.655509 | 5.042060  |
| C | 0.000  | 22.885891 | 5.757378  |
| C | 0.000  | 24.116296 | 5.042064  |
| C | 0.000  | 0.739082  | 5.757322  |
| C | 0.000  | 1.969432  | 5.042126  |
| C | 0.000  | 3.199765  | 5.757414  |
| C | -0.001 | 4.430231  | 5.042129  |
| H | 0.170  | 11.815930 | 9.041611  |
| H | 0.170  | 14.276745 | 9.041621  |
| H | 0.169  | 9.110362  | 12.041808 |
| H | 0.168  | 10.338985 | 9.900572  |
| H | 0.169  | 16.975414 | 12.041728 |
| H | 0.168  | 15.746723 | 9.900511  |
| H | 0.169  | 9.110349  | 13.767239 |
| H | 0.168  | 10.338978 | 15.908502 |
| H | 0.168  | 15.746711 | 15.908575 |
| H | 0.169  | 16.975422 | 13.767310 |
| H | 0.170  | 11.815981 | 16.767449 |
| H | 0.170  | 14.276799 | 16.767439 |

## References

- 1 A. Singh and W. Koros, *Ind. Eng. Chem. Res.*, 1996, **35**, 1231-1234.
- 2 X. Ning and W. J. Koros, *Carbon*, 2014, **66**, 511-522.
- 3 Y. Sun and S. Han, *Mol. Simulat.*, 2015, **41**, 1095-1109.
- 4 Z. Tian, S. M. Mahurin, S. Dai and D.-e. Jiang, *Nano Lett.*, 2017, **17**, 1802-1807.
